# Supplementary material for: Luteolin suppresses 5-hydroxytryptamine elevation in stimulated RBL-2H3 cells and experimental colitis mice
Source: PubMed Central journal article supplement — J Clin Biochem Nutr. 2021 Apr 3;69(1):20–7. doi: 10.3164/jcbn.20-192 (PMC8325766; doi:10.3164/jcbn.20-192), 2021-04-03
Supplement: jcbn20-192sf01.pdf [file jcbn20-192sf01.pdf]

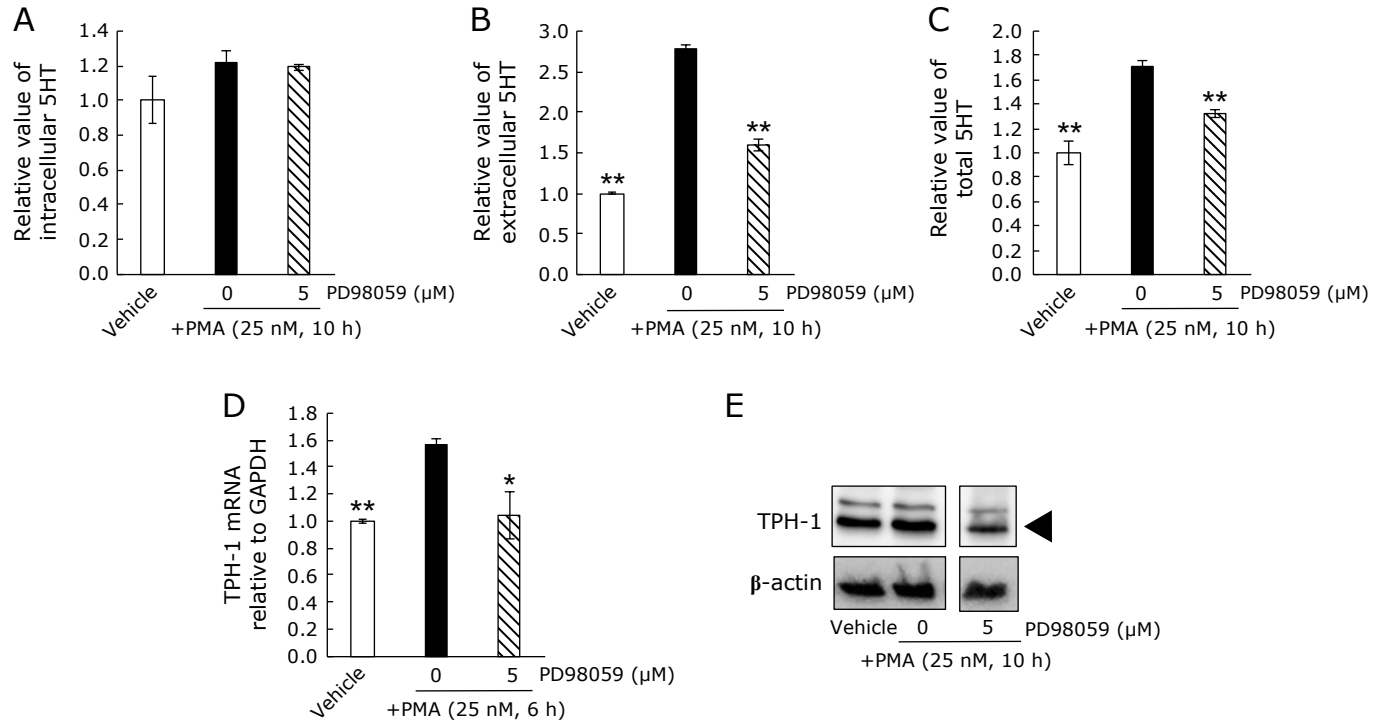

**Supplemental Fig. 1.** The MEK/ERK signal pathway contribution to PMA-stimulated 5HT regulation in RBL-2H3 cells. Cells were treated with the MEK inhibitor, PD98059 (5  $\mu\text{M}$ ), for 30 min followed by PMA stimulation for 10 h. The relative intracellular 5HT (A), extracellular 5HT (B), and total 5HT (C) levels are shown. The PD98059 effect on TPH-1 mRNA expression in PMA-stimulated cells for 10 h is shown (D). Cells were treated with PD98059 for 30 min and then stimulated by PMA for 10 h. After the PD98059 treatment and PMA stimulation, TPH-1 protein levels were analyzed (E). The black triangle indicates the TPH-1 band.
